# Supplementary material for: Biases in read coverage demonstrated by interlaboratory and interplatform comparison of 117 mRNA and genome sequencing experiments
Source: PubMed Central journal article supplement (PMC3358657; doi:10.1186/1471-2105-13-s6-s4), 2012-04-19

**Genomic, Illumina**

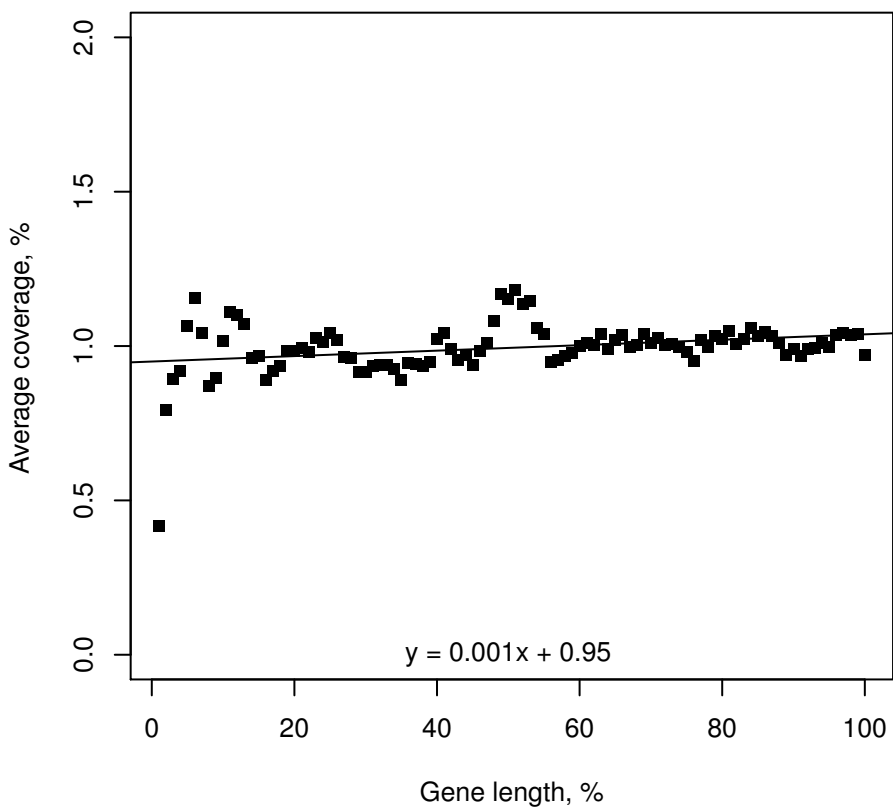

**Genomic, SOLiD**

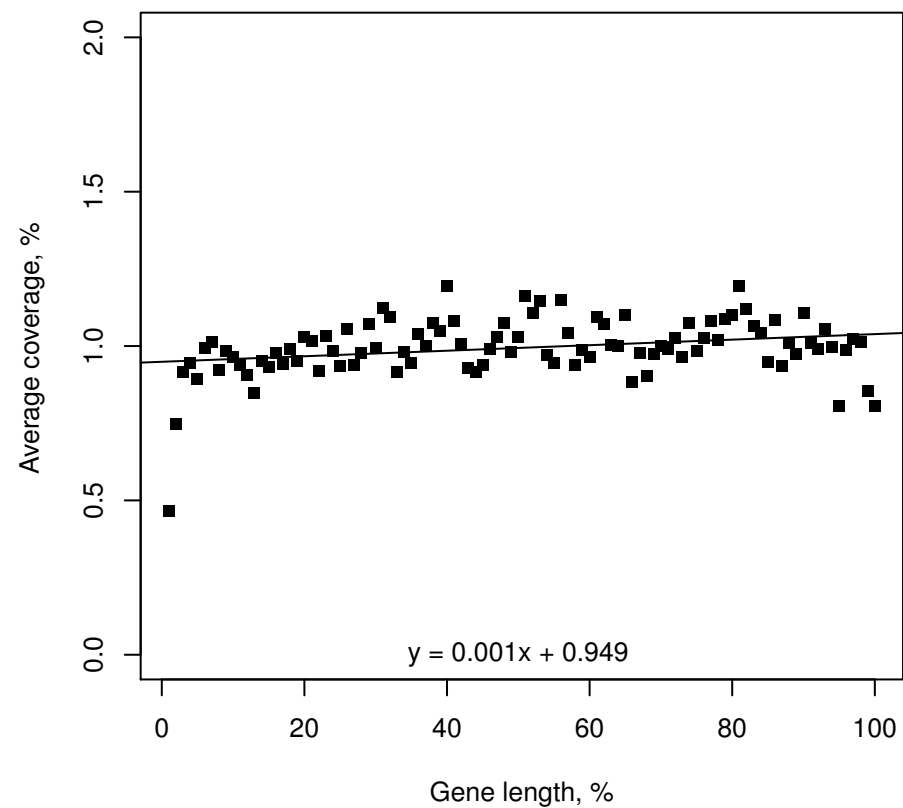

**RNA-seq, Illumina**

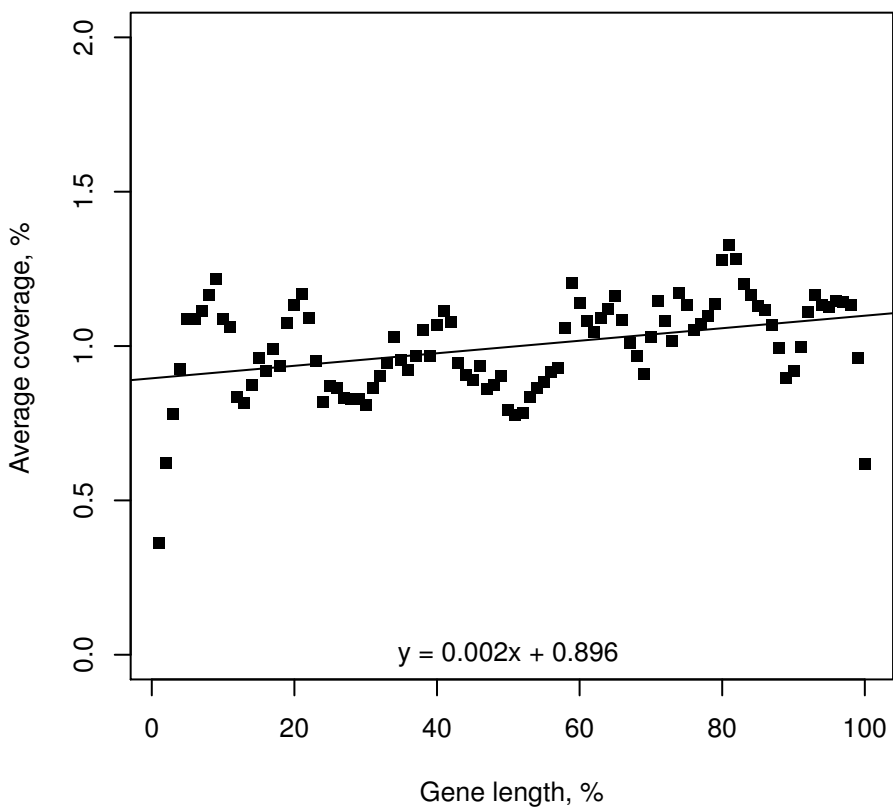

**RNA-seq, SOLiD**

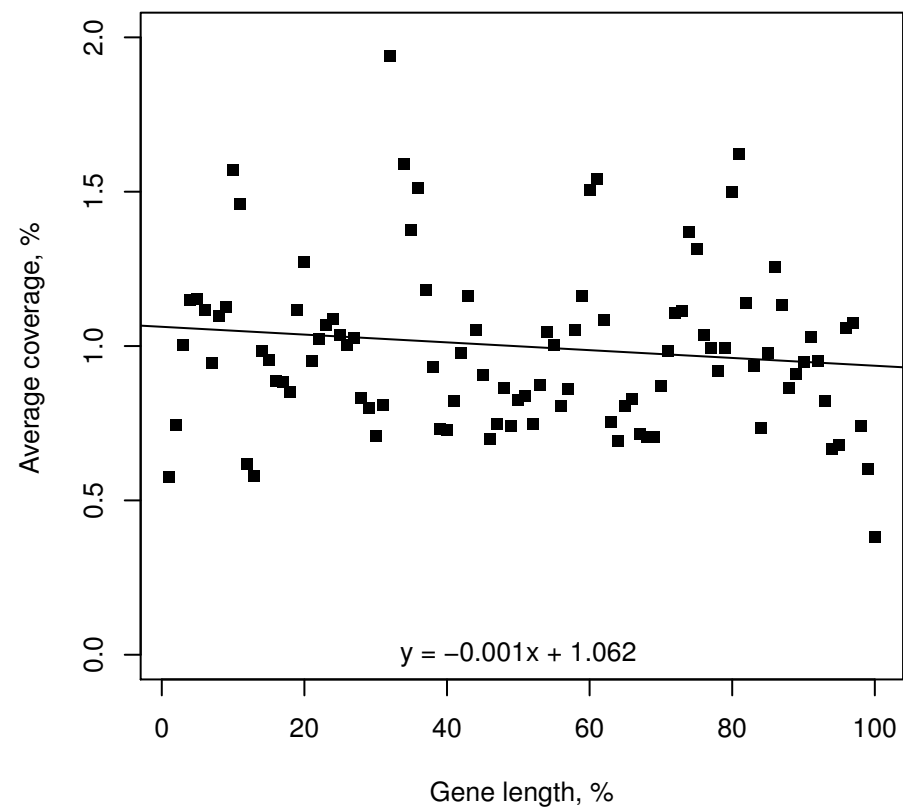

Supplement: 1471-2105-13-S6-S4-S2.pdf [file 1471-2105-13-S6-S4-S2.pdf]
