# Supplementary material for: Biases in read coverage demonstrated by interlaboratory and interplatform comparison of 117 mRNA and genome sequencing experiments
Source: PubMed Central journal article supplement (PMC3358657; doi:10.1186/1471-2105-13-s6-s4), 2012-04-19
Supplement: 1471-2105-13-S6-S4-S4.pdf [file 1471-2105-13-S6-S4-S4.pdf]

Color Key

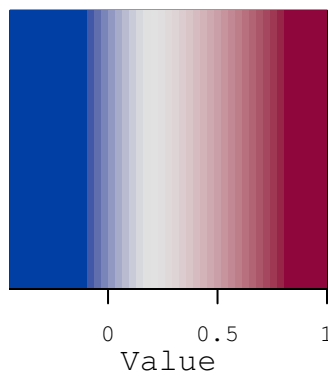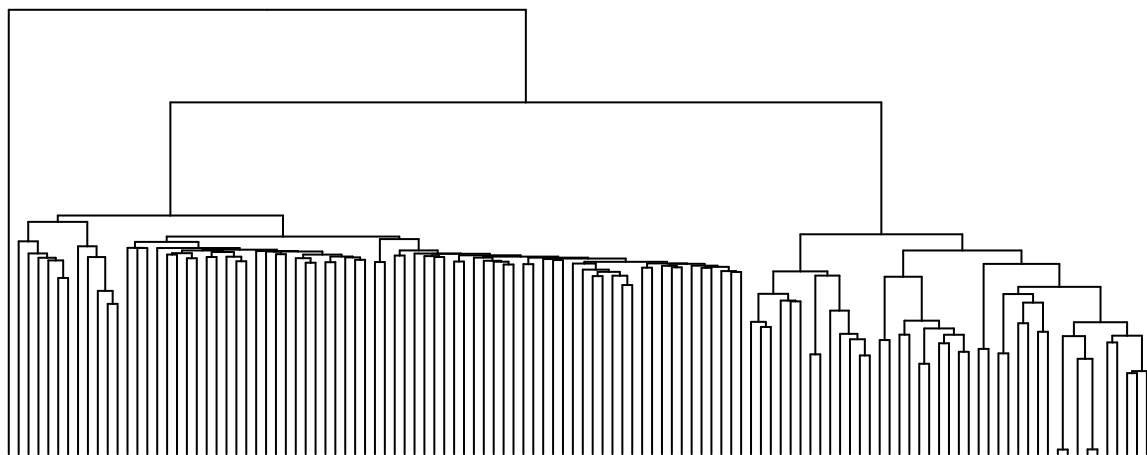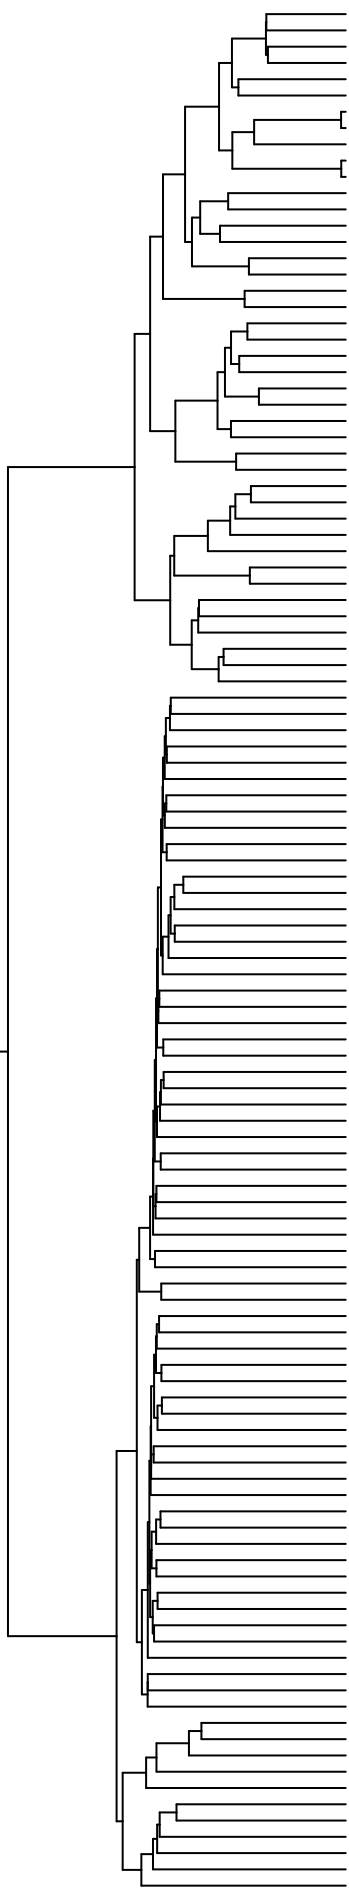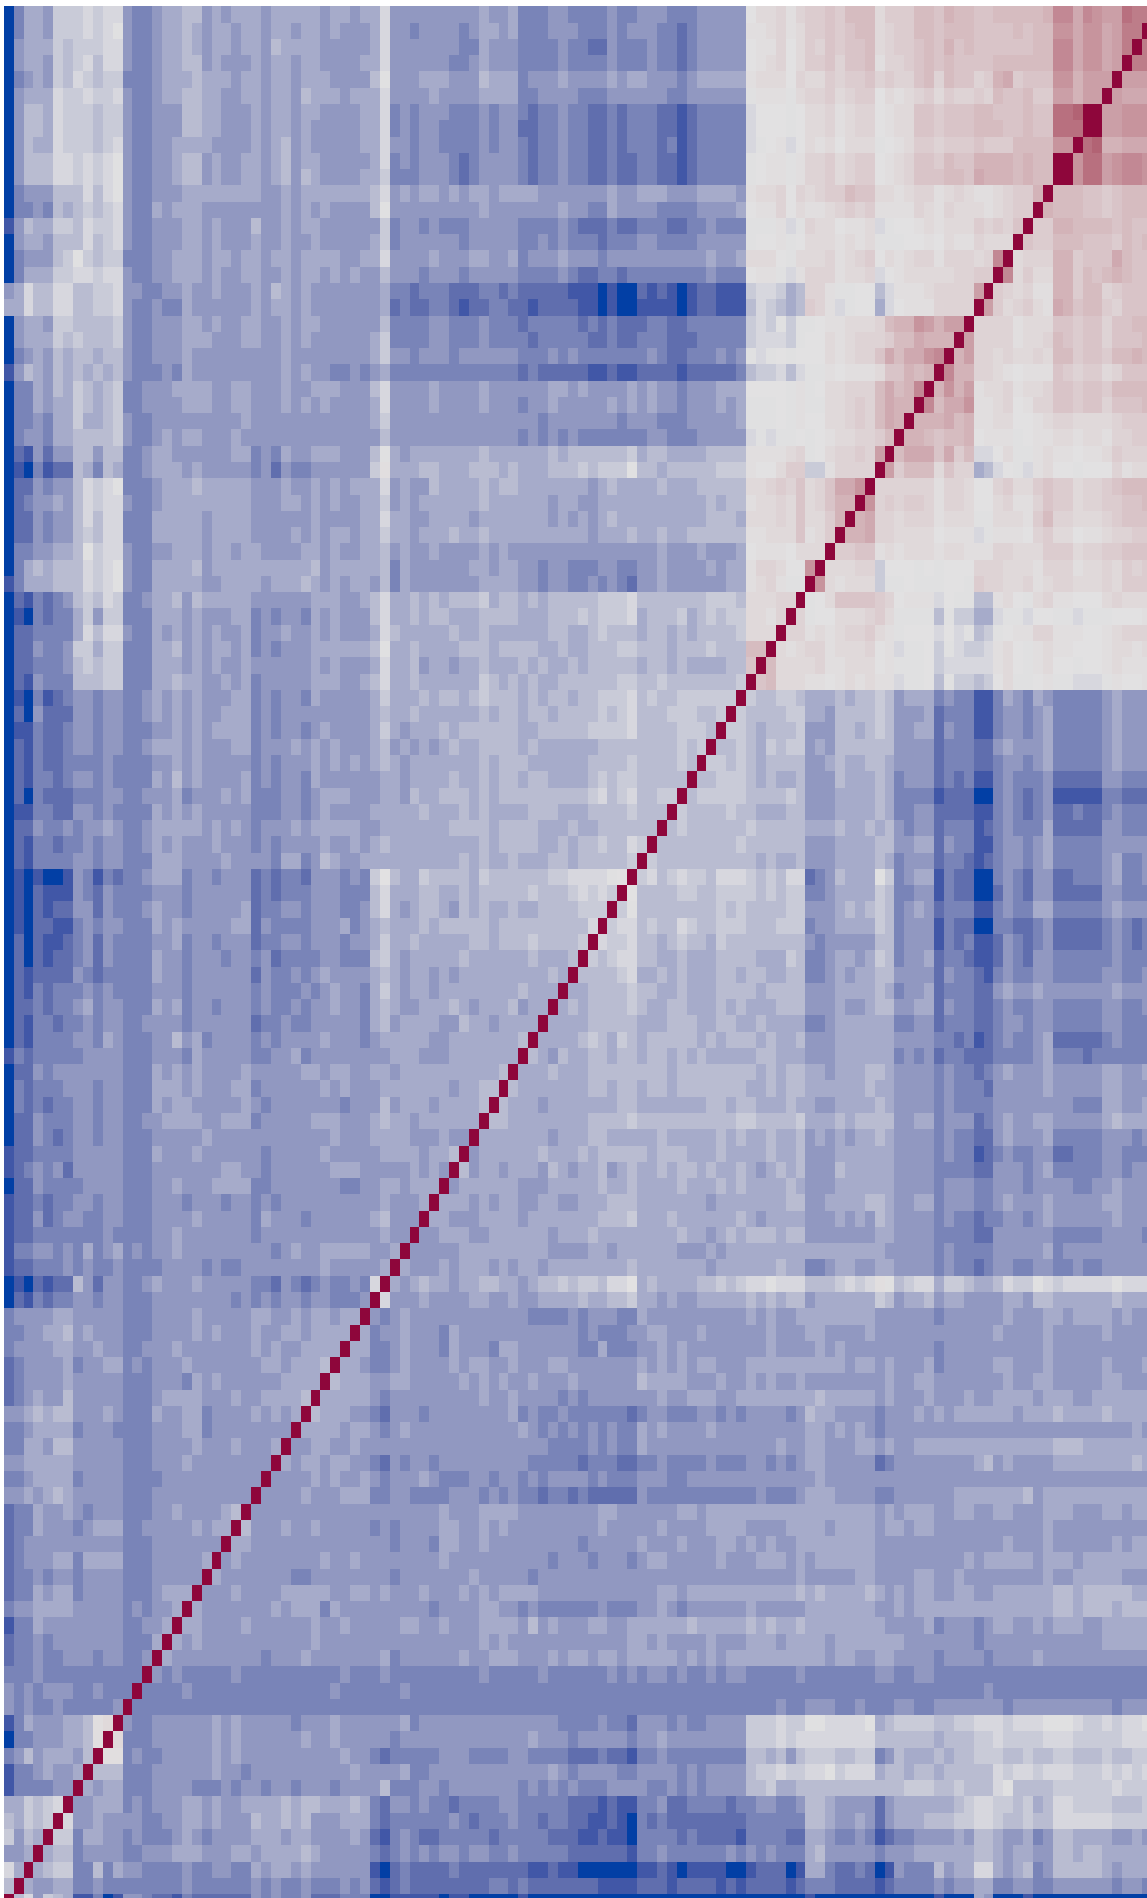

|           |           |            |    |      |                  |                  |
|-----------|-----------|------------|----|------|------------------|------------------|
| SRP001847 | SRX016372 | Berkeley   | RI | 35   | UHR.exp3.prep.S6 |                  |
| SRP001847 | SRX016370 | Berkeley   | RI | 35   | UHR.exp3.prep.S4 |                  |
| SRP001847 | SRX016371 | Berkeley   | RI | 35   | UHR.exp3.prep.S5 |                  |
| SRP001847 | SRX016369 | Berkeley   | RI | 35   | UHR.exp3.prep.S3 |                  |
| SRP001119 | SRX017222 | Yale       | RI | 32   | Temporal.Lobe.22 |                  |
| SRP001119 | SRX017223 | Yale       | RI | 32   | Temporal.Lobe.22 |                  |
| SRP001847 | SRX016359 | Berkeley   | RI | 35   | Brain.exp2.phi.X |                  |
| SRP001847 | SRX016366 | Berkeley   | RI | 35   | Brain.exp2.auto  |                  |
| SRP003611 | SRX027129 | Genentech  | RI | 50   | brain            |                  |
| SRP001847 | SRX016367 | Berkeley   | RI | 35   | UHR.exp2.phi.X   |                  |
| SRP001847 | SRX016368 | Berkeley   | RI | 35   | Brain.exp2.auto  |                  |
| SRP001563 | SRX014948 | CHOP       | RI | 50   | GM12004.lymphobl |                  |
| SRP001563 | SRX014941 | CHOP       | RI | 50   | GM11839.lymphobl |                  |
| SRP001540 | SRX014652 | Chicago    | RI | 46   | NA19172.lymphobl |                  |
| SRP001540 | SRX014651 | Chicago    | RI | 46   | NA19093.lymphobl |                  |
| SRP002079 | SRX017378 | Yale       | RI | 250  | 36               | neural.progenit  |
| SRP002079 | SRX017385 | Yale       | RI | 250  | 36               | early.glial-like |
| SRP000823 | SRX005317 | NHLBI      | RI | 36   | CD4.T.cell       |                  |
| SRP000823 | SRX005318 | NHLBI      | RI | 36   | Jurkat.T.cell    |                  |
| SRP000626 | SRX003114 | Toronto    | RI | 32   | cerebral.cortex  |                  |
| SRP000626 | SRX003117 | Toronto    | RI | 32   | lung             |                  |
| SRP000727 | SRX003933 | Toronto    | RI | 32   | testes           |                  |
| SRP000727 | SRX003931 | Toronto    | RI | 32   | colon            |                  |
| SRP000302 | SRX001365 | NCGR       | RI | 36   | HCT341           |                  |
| SRP000302 | SRX001366 | NCGR       | RI | 36   | HCT342           |                  |
| SRP000626 | SRX003118 | Toronto    | RI | 32   | skeletal.muscle  |                  |
| SRP000626 | SRX003115 | Toronto    | RI | 32   | heart            |                  |
| SRP000626 | SRX017227 | Toronto    | RI | 32   | brain            |                  |
| SRP000626 | SRX003116 | Toronto    | RI | 32   | liver            |                  |
| SRP000228 | SRX000569 | Caltech    | RI | 33   | K562.leukemia    |                  |
| SRP000228 | SRX000570 | Caltech    | RI | 33   | K562.leukemia    |                  |
| SRP000228 | SRX000566 | Caltech    | RI | 33   | NA12878.lymphobl |                  |
| SRP000228 | SRX000565 | Caltech    | RI | 33   | NA12878.lymphobl |                  |
| SRP003497 | SRX026671 | UCSC       | RI | 33   | liver.carcinoma  |                  |
| SRP003404 | SRX026160 | GSC        | RI | 200  | 42               | colorect.cancer  |
| SRP003404 | SRX026158 | GSC        | RI | 200  | 42               | colorect.cancer  |
| SRP000225 | SRX000605 | Yale       | RI | 36   | kidney           |                  |
| ERP000087 | ERX002245 | SC         | RI | 175  | 37               | On-flowcell.RT   |
| SRP003611 | SRX027126 | Genentech  | RI | 75   | normal.prostate  |                  |
| SRP000931 | SRX006124 | BI         | RI | 500  | 51               | M990514.melanoma |
| SRP000931 | SRX006126 | BI         | RI | 500  | 51               | M990802.melanoma |
| SRP000931 | SRX006127 | BI         | RI | 500  | 51               | M980409.melanoma |
| SRP000239 | SRX000600 | Illumina   | GI | 200  | 36               | NA18507.YR       |
| ERP000053 | ERX000495 | BGI        | GI | 35   | Han.Chinese      |                  |
| SRP000032 | SRX001956 | ABI        | GS | 1500 | 36               | NA12878.CEU.1    |
| SRP000031 | ERX000060 | Illumina   | GI | 200  | 51               | NA12716.CEPH-1   |
| SRP000031 | ERX000061 | Illumina   | GI | 200  | 51               | NA12717.CEPH-1   |
| SRP001050 | SRX007392 | Illumina   | GI | 200  | 50               | NA18508.african  |
| SRP001523 | SRX025045 | WUGSC      | GI | 200  | 100              | HG01360.colomb   |
| SRP000805 | SRX014126 | BI         | GI | 76   | NA19703.african  |                  |
| SRP001576 | SRX018840 | GMI        | GI | 500  | 76               | NA10851.CEPH-1   |
| SRP002509 | SRX021031 | Illumina   | GI | 300  | 100              | John.West        |
| SRP000805 | SRX014125 | BI         | GI | 76   | NA19703.african  |                  |
| SRP000803 | SRX022665 | BI         | GI | 550  | 76               | NA19681.mexican  |
| SRP001293 | ERX006562 | SC         | GI | 450  | 108              | HG00560.chinese  |
| SRP000246 | SRX000675 | BI         | GI | 36   | NCI-H2347.lung   |                  |
| SRP001514 | SRX025049 | WUGSC      | GI | 100  | HG01518.spanish  |                  |
| SRP001294 | ERX006226 | SC         | GI | 450  | 108              | HG00231.british  |
| SRP000808 | ERX006082 | SC         | GI | 450  | 108              | HG00181.finnish  |
| SRP001293 | ERX006091 | SC         | GI | 450  | 108              | HG00560.chinese  |
| SRP000808 | ERX005891 | SC         | GI | 450  | 108              | HG00368.finnish  |
| SRP000803 | SRX016613 | BI         | GI | 500  | 76               | NA19658.mexican  |
| SRP001525 | ERX006112 | SC         | GI | 450  | 108              | HG00637.PuertoRi |
| SRP001514 | SRX025128 | WUGSC      | GI | 100  | HG01522.spanish  |                  |
| SRP002509 | SRX021032 | Illumina   | GI | 300  | 100              | John.West        |
| SRP000978 | SRX006834 | Illumina   | GI | 200  | 50               | NA18506.african  |
| SRP000978 | SRX006833 | Illumina   | GI | 200  | 35               | NA18506.african  |
| ERP000053 | ERX000497 | BGI        | GI | 35   | Han.Chinese      |                  |
| SRP001050 | SRX007391 | Illumina   | GI | 200  | 35               | NA18508.african  |
| SRP000543 | ERX002757 | SC         | GI | 400  | 108              | NA19462.luhya    |
| SRP001523 | SRX025129 | WUGSC      | GI | 100  | HG01495.colomb   |                  |
| SRP000607 | SRX002761 | KRIBB      | GI | 200  | 75               | Kim.Seong-jin    |
| SRP000031 | SRX001958 | ABI        | GS | 1500 | 26               | NA07357.CEPH-1   |
| SRP000246 | SRX000677 | BI         | GI | 36   | HCC1143.lymphobl |                  |
| SRP000737 | SRX011530 | GMI        | GI | 150  | 36               | korean.male      |
| SRP001525 | ERX006110 | SC         | GI | 450  | 108              | HG00553.PuertoRi |
| ERP000121 | ERX004000 | MPI-EVA    | GI | 250  | 76               | HGDP00542.papuan |
| SRP000543 | SRX012608 | BI         | GI | 76   | NA19474.luhya    |                  |
| SRP000698 | SRX011551 | London     | RI | 200  | 45               | CD4.T.cell       |
| SRP000698 | SRX011552 | London     | GI | 200  | 45               | CD4.T.cell       |
| ERP000121 | ERX004003 | MPI-EVA    | GI | 250  | 76               | HGDP00521.french |
| SRP001693 | SRX015621 | Illumina   | GI | 200  | 75               | Jay.Flatley      |
| SRP000544 | SRX015064 | BI         | GI | 76   | NA18984.japanese |                  |
| SRP001139 | SRX008794 | BGI        | GI | 500  | 75               | YanHuang1        |
| SRP000542 | SRX007553 | BI         | GI | 400  | 76               | NA19248.YR1      |
| SRP001576 | SRX018835 | GMI        | GI | 500  | 36               | NA10851.CEPH-1   |
| SRP000546 | ERX006293 | BGI        | GI | 465  | 45               | HG00428.chinese  |
| SRP000547 | ERX002666 | SC         | GI | 400  | 76               | NA12546.CEPH-2   |
| SRP000540 | ERX004989 | SC         | GI | 200  | 54               | NA20814.tuscan   |
| SRP001703 | SRX015667 | CCGB       | GI | 300  | 36               | Kalahari.Bushman |
| SRP001139 | SRX008791 | BGI        | GI | 500  | 44               | YanHuang1        |
| SRP000544 | ERX006522 | SC         | GI | 175  | 76               | NA19005.japanese |
| SRP002122 | SRX017838 | KIAE-LGA   | GS | 900  | 26               | renal.carcinoma  |
| SRP000031 | SRX001964 | ABI        | GS | 1500 | 26               | NA06986.CEPH-2   |
| SRP001703 | SRX016480 | CCGB       | GS | 1400 | 26               | Archbishop.Tutu  |
| SRP000726 | SRX003959 | ABHTD      | GS | 51   | NA18507.YR1      |                  |
| SRP000726 | SRX003960 | ABHTD      | GS | 51   | NA18507.YR1      |                  |
| SRP000542 | ERX001064 | SC         | GI | 175  | 37               | NA19190.YR1      |
| SRP000239 | SRX001539 | Illumina   | GI | 1840 | 36               | NA18507.YR1      |
| SRP000031 | ERX000059 | Illumina   | GI | 200  | 51               | NA12249.CEPH-1   |
| SRP000607 | SRX002760 | KRIBB      | GI | 300  | 25               | Kim.Seong-jin    |
| SRP001294 | SRX020474 | BI         | GI | 500  | 76               | HG00262.british  |
| SRP000737 | SRX011528 | GMI        | GI | 400  | 36               | korean.male      |
| SRP003680 | SRX028038 | BI         | GI | 850  | 76               | NA12878.CEU1     |
| SRP003680 | SRX028047 | BI         | GI | 850  | 76               | NA12878.CEU1     |
| SRP002338 | SRX019403 | Karolinska | RS | 51   | squam.carcinoma  |                  |
| SRP002338 | SRX019490 | Karolinska | RS | 51   | osteosarcoma     |                  |
| SRP002338 | SRX019489 | Karolinska | RS | 51   | glioma           |                  |
| SRP003497 | SRX026680 | UCSC       | RI | 76   | liver.carcinoma  |                  |
| ERP000087 | ERX002246 | SC         | RI | 175  | 37               | On-flowcell.RT   |
| SRP000540 | ERX000618 | SC         | GI | 200  | 54               | NA20521.tuscan   |
| SRP000547 | ERX006243 | MPIMG      | GI | 200  | 51               | NA12843.CEPH-2   |
| SRP000546 | ERX005513 | SC         | GI | 400  | 108              | NA18625.chinese  |
| SRP002122 | SRX017837 | KIAE-LGA   | GI | 600  | 36               | renal.carcinoma  |
| SRP001453 | SRX013934 | BGI        | GI | 70   | Palaeo-Eskimo    |                  |
| SRP001453 | SRX013970 | BGI        | GI | 76   | Palaeo-Eskimo    |                  |
| SRP000225 | SRX000571 | Yale       | RI | 36   | liver            |                  |
